# Supplementary material for: Identification and Evolutionary Characteristic Analysis of STARD Gene Family, and Overexpression VvSTARD5 Responses to Salt Stress in Tomato
Source: Research Square preprint supplement (doi:10.21203/rs.3.rs-1109124/v1), 2022-01-10
Supplement: Supplementary file 1 [file 0894385053bd8605256cde4a.docx]

Table3. Subcellular location prediction of STARD proteins in grapes

| protein | Nucl | Chlo | Cyto | Plas | Cysk | Mito | Extr | Vacu | Golg |
| --- | --- | --- | --- | --- | --- | --- | --- | --- | --- |
| VvSTARD1 | 13 | － | － | － | － | － | － | － | － |
| VvSTARD2 | 10.5 | － | 3.5 | － | － | － | － | － | － |
| VvSTARD3 | 7 | 6 | － | － | － | － | － | － | － |
| VvSTARD4 | 10 | 1 | 2 | － | － | － | － | － | － |
| VvSTARD5 | 6 | 5 | 3 | － | － | － | － | － | － |
| VvSTARD6 | 12 | 2 | － | － | － | － | － | － | － |
| VvSTARD7 | 12 | 1 | － | － | － | － | － | － | － |
| VvSTARD8 | 14 | － | － | － | － | － | － | － | － |
| VvSTARD9 | 4 | 1 | 6 | － | － | － | － | 2 | － |
| VvSTARD10 | 5 | 1 | 3 | － | － | 1 | － | 2 | － |
| VvSTARD11 | 6 | 1 | 4 | － | － | － | － | 2 | － |
| VvSTARD12 | 3 | 6 | 2 | － | 2 | － | － | － | － |
| VvSTARD13 | 7 | 3 | 2 | － | － | － | － | 1 | － |
| VvSTARD14 | 10 | － | 3 | － | － | － | － | － | － |
| VvSTARD15 | 5 | 9 | － | － | － | － | － | － | － |
| VvSTARD16 | 2 | 5 | － | 1 | － | 3.5 | － | － | － |
| VvSTARD17 | 2 | 9 | 1 | － | － | 1 | 2 | － | － |
| VvSTARD18 | 3 | 1 | 7 | － | － | － | － | 2 | － |
| VvSTARD19 | － | － | － | 9 | － | － | － | 2 | － |
| VvSTARD20 | 3 | 1 | 6 | － | － | － | 1 | － | 2 |
| VvSTARD21 | － | 13.5 | － | － | － | － | － | － | － |
| VvSTARD22 | － | 11 | － | － | － | 2 | － | － | － |
| VvSTARD23 | 9 | 3 | 1 | － | － | － | － | － | － |

Note: Nucl, Nuclear; Chlo, Chloroplast; Cyto, Cytoplasmic; Plas, plasma membrane; Cysk, cytoskeleton; Mito, Mitochondrial; Extr, extracellular matrix; Vacu, vacuole; Golg, Golgi apparatus.
