# Supplementary material for: Identification and Evolutionary Characteristic Analysis of STARD Gene Family, and Overexpression VvSTARD5 Responses to Salt Stress in Tomato
Source: Research Square preprint supplement (doi:10.21203/rs.3.rs-1109124/v1), 2022-01-10
Supplement: Supplementary file 3 [file ba43738ab48ad8b538ab5b68.docx]

| Model | Description | PDB ID | Protein |
| --- | --- | --- | --- |
| 1 | Thioesterase, adipose associated, isoform BFIT2 | 3FO5 | VvSTARD14,16,18 |
| 2 | Lipid-transfer protein CERT | 2z9y | VvSTARD2-8,15,17,20,21 |
| 3 | StAR-related lipid transfer protein13 | 2PSO | VvSTARD1-13,20 |
| 4 | MLN64 protein | 1EM2 | VvSTARD9,10,11,12 |
| 5 | StAR-related lipid transfer protein5 | 2R55 | VvSTARD10,13 |
| 6 | Cholesterol-regulated START protein4 | 1JSS | VvSTARD11,13,19 |
| 7 | StAR-related lipid transfer protein3 | 5i9j | VvSTARD4,7 |
| 8 | Phosphatidylcholine transfer protein (PCTP) | 1LN1 | VvSTARD21,22 |

Table S7. Data of the tertiary structure of VvSTARD proteins in grapes
